# Supplementary material for: Highly efficient methyl orange adsorption by UV-012, a new crystalline Co(ii) MOF
Source: Royal Society of Chemistry journal article supplement (doi:10.1039/d0ce00741b), 2021-01-01
Supplement: d0ce00741b1.pdf [file d0ce00741b1.pdf]

## Supporting info

**Table S1.** Crystallographic data for **UV-012**.

| Compound                                 | <b>UV-012</b>                                                                  |
|------------------------------------------|--------------------------------------------------------------------------------|
| Chemical formula                         | C <sub>31</sub> H <sub>30</sub> Co <sub>2</sub> N <sub>4</sub> O <sub>12</sub> |
| Formula weight                           | 768.45                                                                         |
| Space group                              | orthorhombic                                                                   |
| Crystal system                           | <i>Pbn</i>                                                                     |
| Crystal size (mm <sup>3</sup> )          | 0.15 x 0.125 x 0.025                                                           |
| Crystal color and shape                  | Violet plate                                                                   |
| a(Å)                                     | 7.6879(1)                                                                      |
| b(Å)                                     | 16.0216(4)                                                                     |
| c(Å)                                     | 25.5781(6)                                                                     |
| α(°)                                     | 90                                                                             |
| β(°)                                     | 90                                                                             |
| γ(°)                                     | 90                                                                             |
| Volume (Å <sup>3</sup> )                 | 3150.5(12)                                                                     |
| Formula units per cell, Z                | 4                                                                              |
| δ <sub>calc</sub> (g cm <sup>-3</sup> )  | 1.584                                                                          |
| μ (mm <sup>-1</sup> )                    | 1.112                                                                          |
| R (int)                                  | 0.0831                                                                         |
| F(000)                                   | 1524                                                                           |
| Temperature of measurement (K)           | 293(2)                                                                         |
| θ Limits (°)                             | 1.59–27.49                                                                     |
| No. of reflections collected             | 29608                                                                          |
| No. of independent reflections           | 3609                                                                           |
| No. of observed reflections              | 2456                                                                           |
| R [F <sup>2</sup> > 2σ(F <sup>2</sup> )] | 0.0687                                                                         |
| wR (F <sup>2</sup> )                     | 0.2266                                                                         |
| Goodness of fit, S                       | 1.092                                                                          |
| No. of parameters                        | 227                                                                            |
| Δρ <sub>min</sub> (e Å <sup>-3</sup> )   | -0.544                                                                         |
| Δρ <sub>max</sub> (e Å <sup>-3</sup> )   | 2.199                                                                          |

**Table S2.** Selected bond distances (Å) and bond angles (°) for **UV-012**.

| <b>Compound 2</b>       |            |
|-------------------------|------------|
| <i>Bond lengths (Å)</i> |            |
| Co1 – N1                | 2.084 (9)  |
| Co1 – N2                | 2.156 (10) |
| Co1 – O2                | 2.459 (16) |
| Co1 – O1                | 2.032 (8)  |
| Co1 – O5                | 2.339 (12) |
| Co1 – O3                | 1.964 (8)  |
| <i>Bond angles (°)</i>  |            |
| N1-Co1-N2               | 99.31 (4)  |
| N1-Co1-O1               | 143.01 (4) |
| N1-Co1-O5               | 88.25 (4)  |
| N1-Co1-O3               | 105.82 (4) |
| N2-Co1-O1               | 95.62 (4)  |
| N2-Co1-O5               | 172.41 (4) |
| N2-Co1-O3               | 99.34 (4)  |
| O2-Co1-O5               | 78.52 (4)  |
| O3-Co1-O5               | 77.76 (4)  |
| O3-Co1-O1               | 104.9 (3)  |

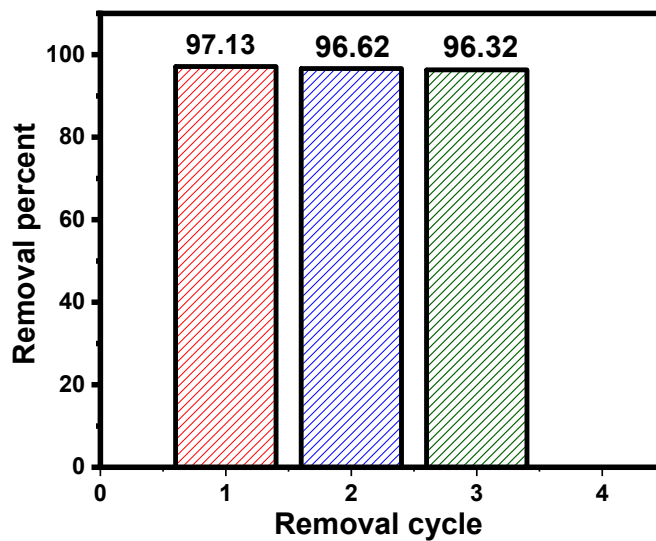

Figure S1) UV-012 reutilization cycles for MO adsorption.

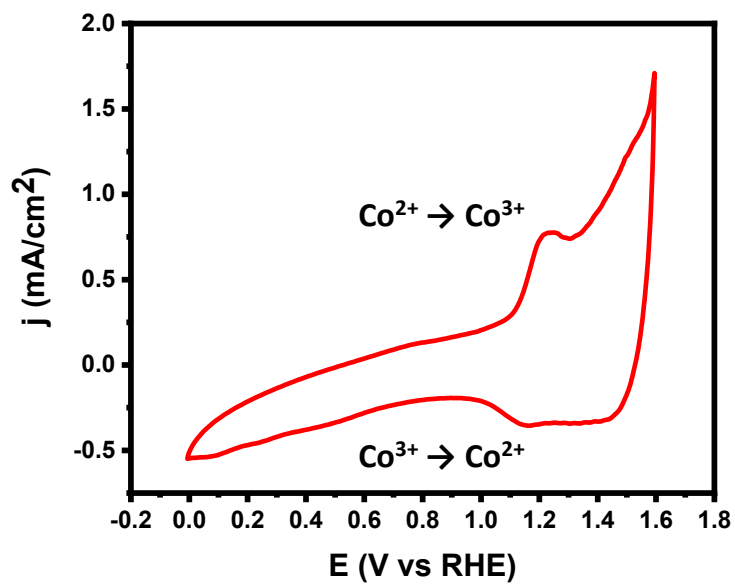

Figure S2) UV-012 cyclic voltammetry experiments
